# Supplementary material for: Novel Mesogenic Vinyl Ketone Monomers and Their Based Polymers
Source: MDPI journal article supplement (doi:10.3390/polym15010005), 2022-12-20
Supplement: s1 [file s1]

# Novel mesogenic vinyl ketone monomers and their based polymers

Derikov Y.I.<sup>1</sup>, Belousov D.R.<sup>1,2</sup>, Finko A.V.<sup>1,3</sup>, Shandryuk G.A.<sup>1</sup>, Kuz'menok N.M.<sup>4</sup>, Mikhalyonok S.G.<sup>4</sup>, Bezborodov V.S.<sup>4</sup> and Chernikova E.V.<sup>1,3</sup>, Talroze R.V.<sup>1\*</sup>

<sup>1</sup> A.V. Topchiev Institute of Petrochemical Synthesis Russian Academy of Sciences, Moscow 119991, Russia

<sup>2</sup> D. Mendeleev University of Chemical Technology of Russia, Moscow, 125047 Russia

<sup>3</sup> M.V. Lomonosov Moscow State University, Faculty of Chemistry, Moscow, 119991 Russia

<sup>4</sup> Belarusian State Technological University. Department of Chemistry, Minsk, 220006 Belarus

\* Correspondence: rtalroze@ips.ac.ru

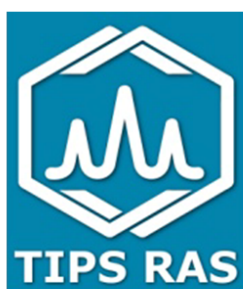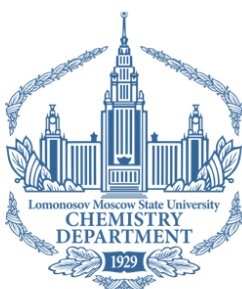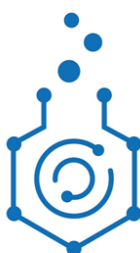

MENDELEEV  
UNIVERSITY

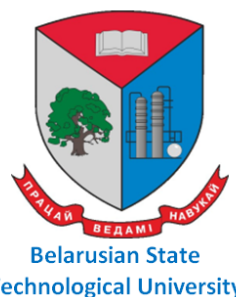

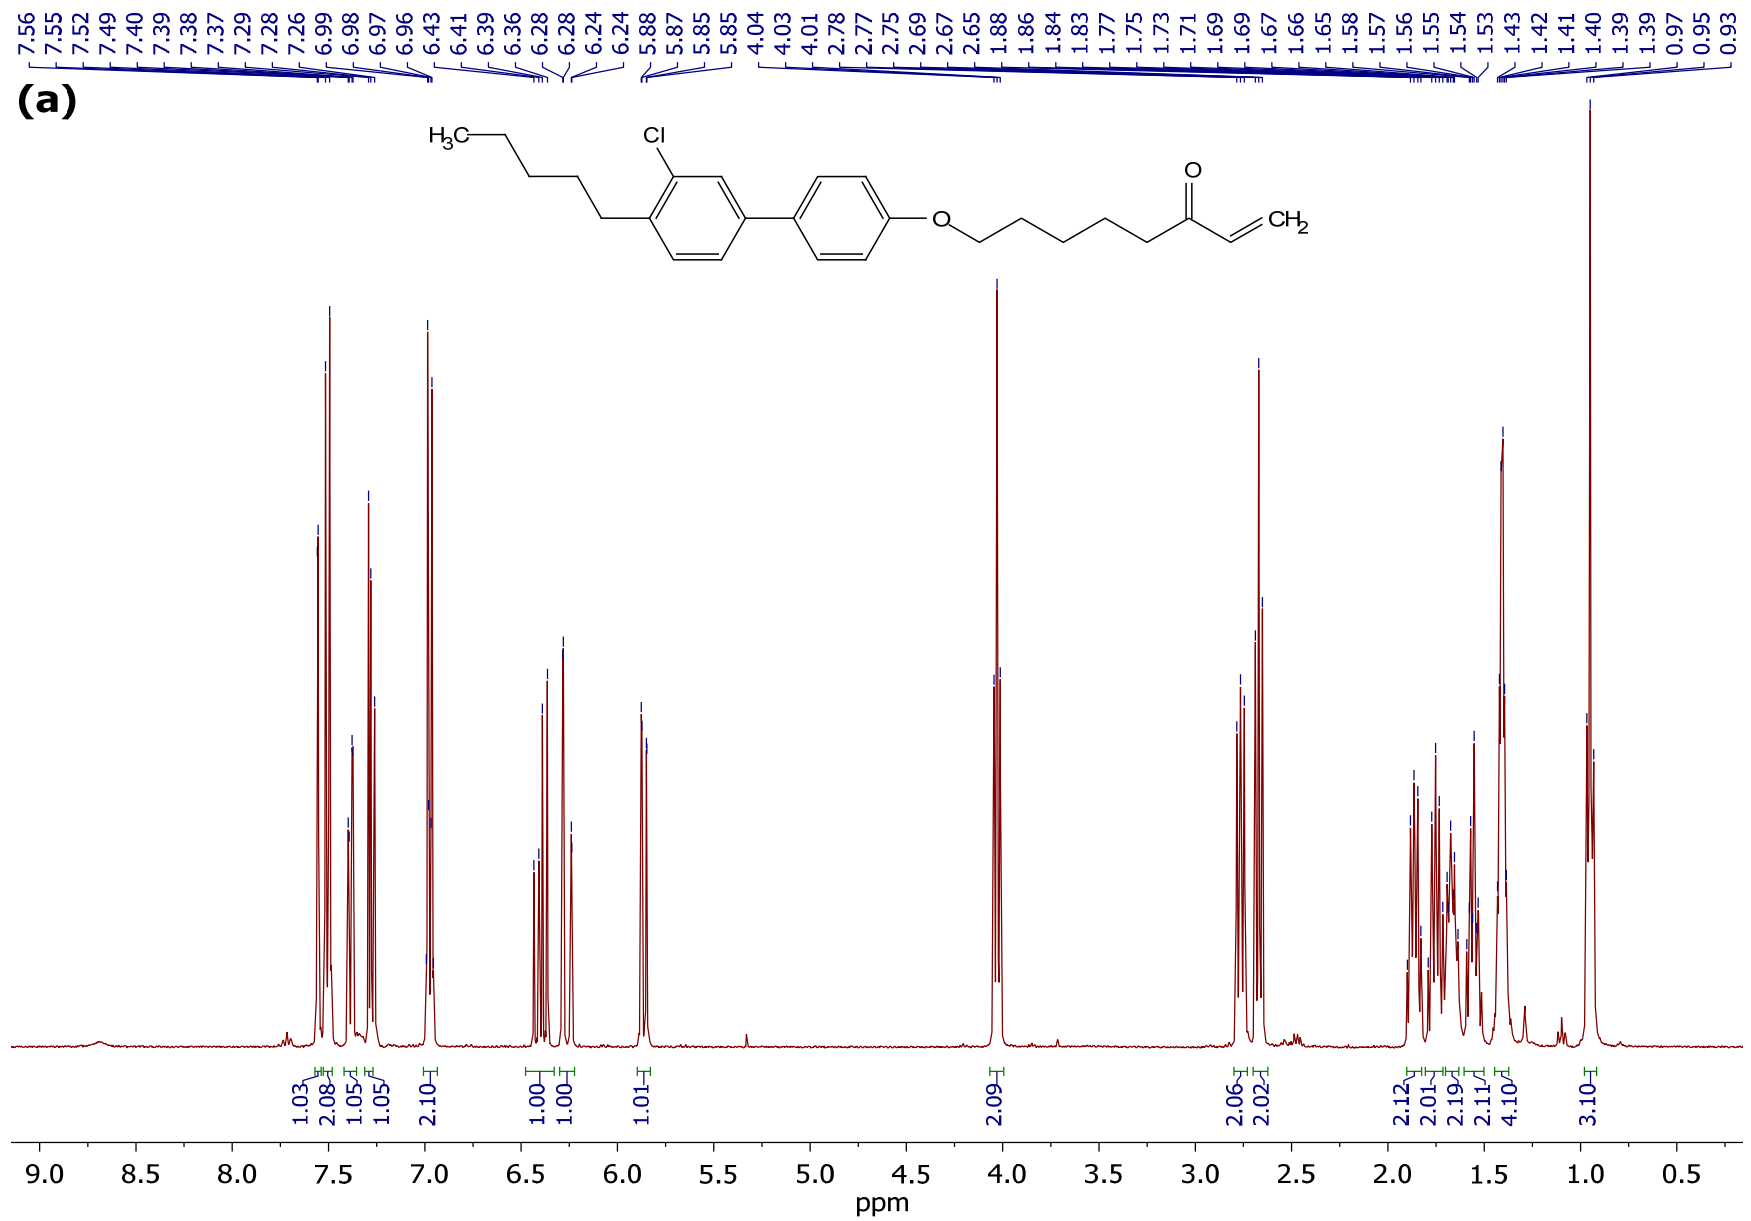

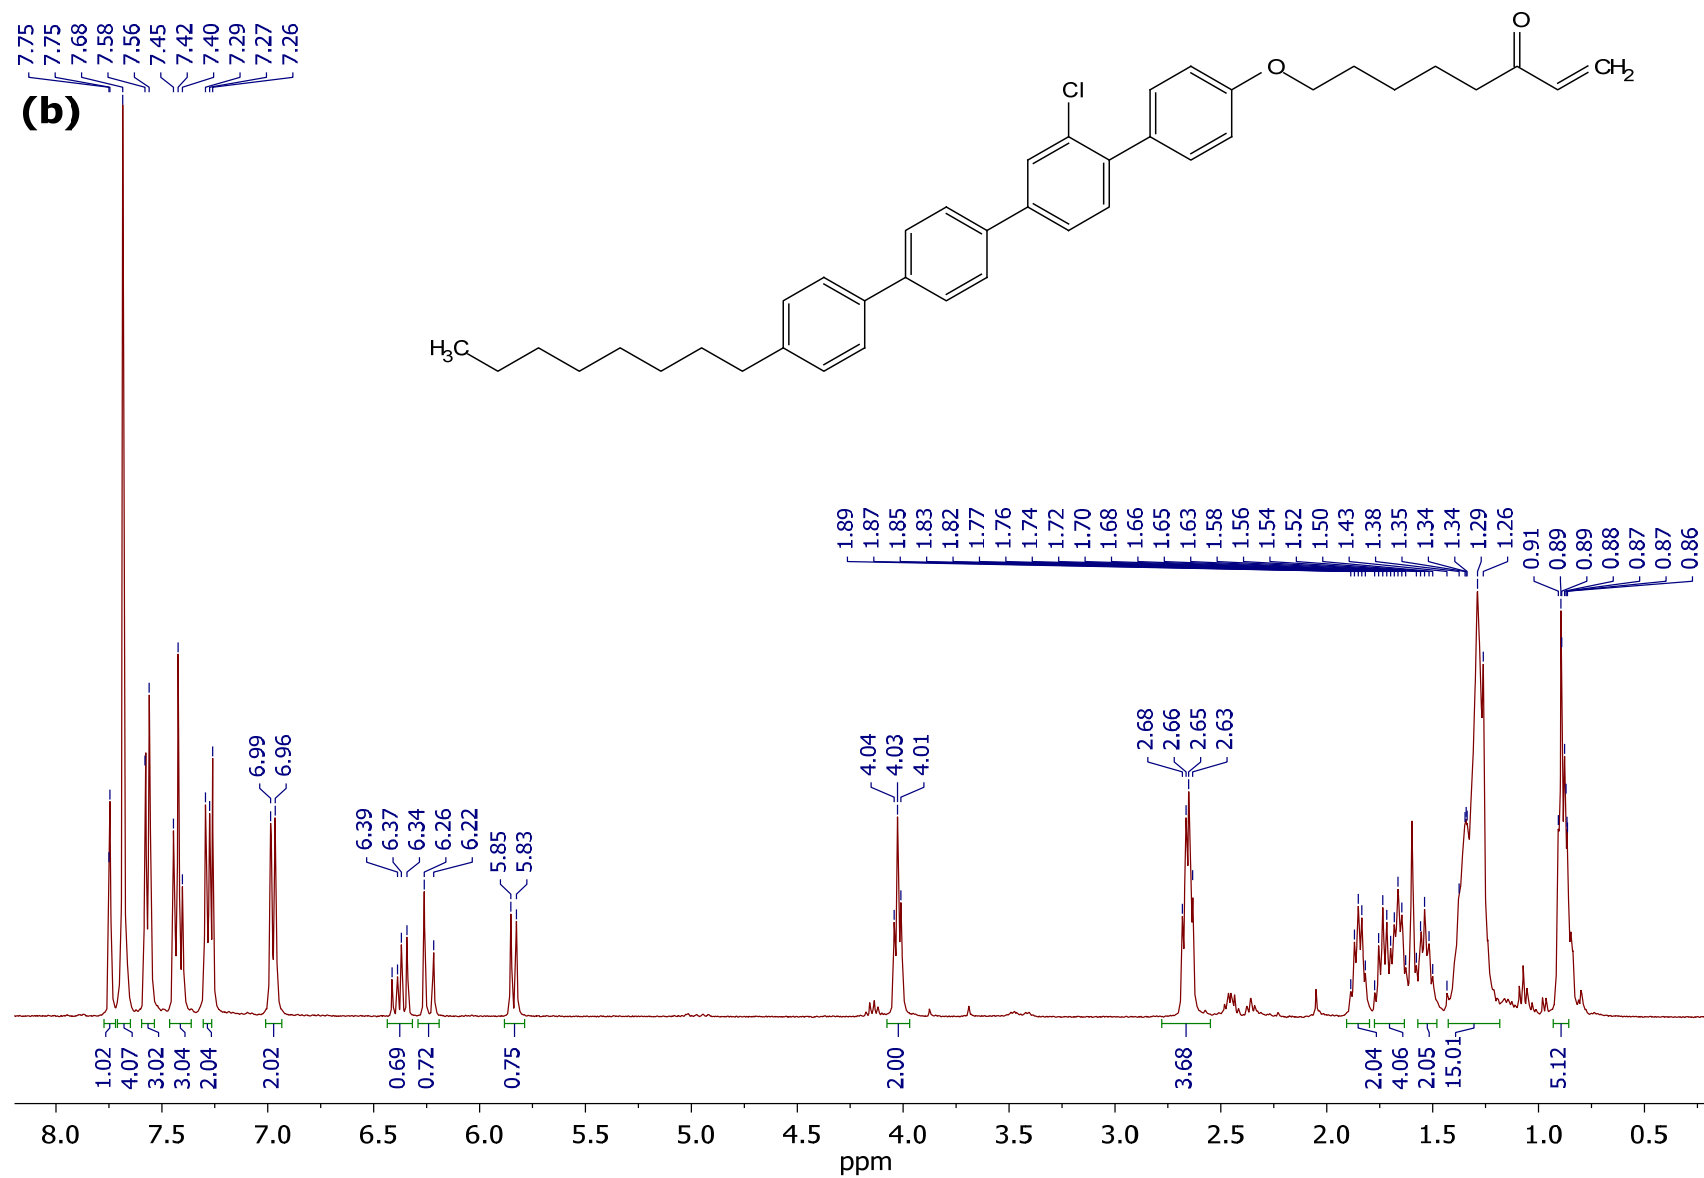

**Figure S1.** The <sup>1</sup>H spectra of BVK (a) and QVK (b) in CDCl<sub>3</sub>.

(a)

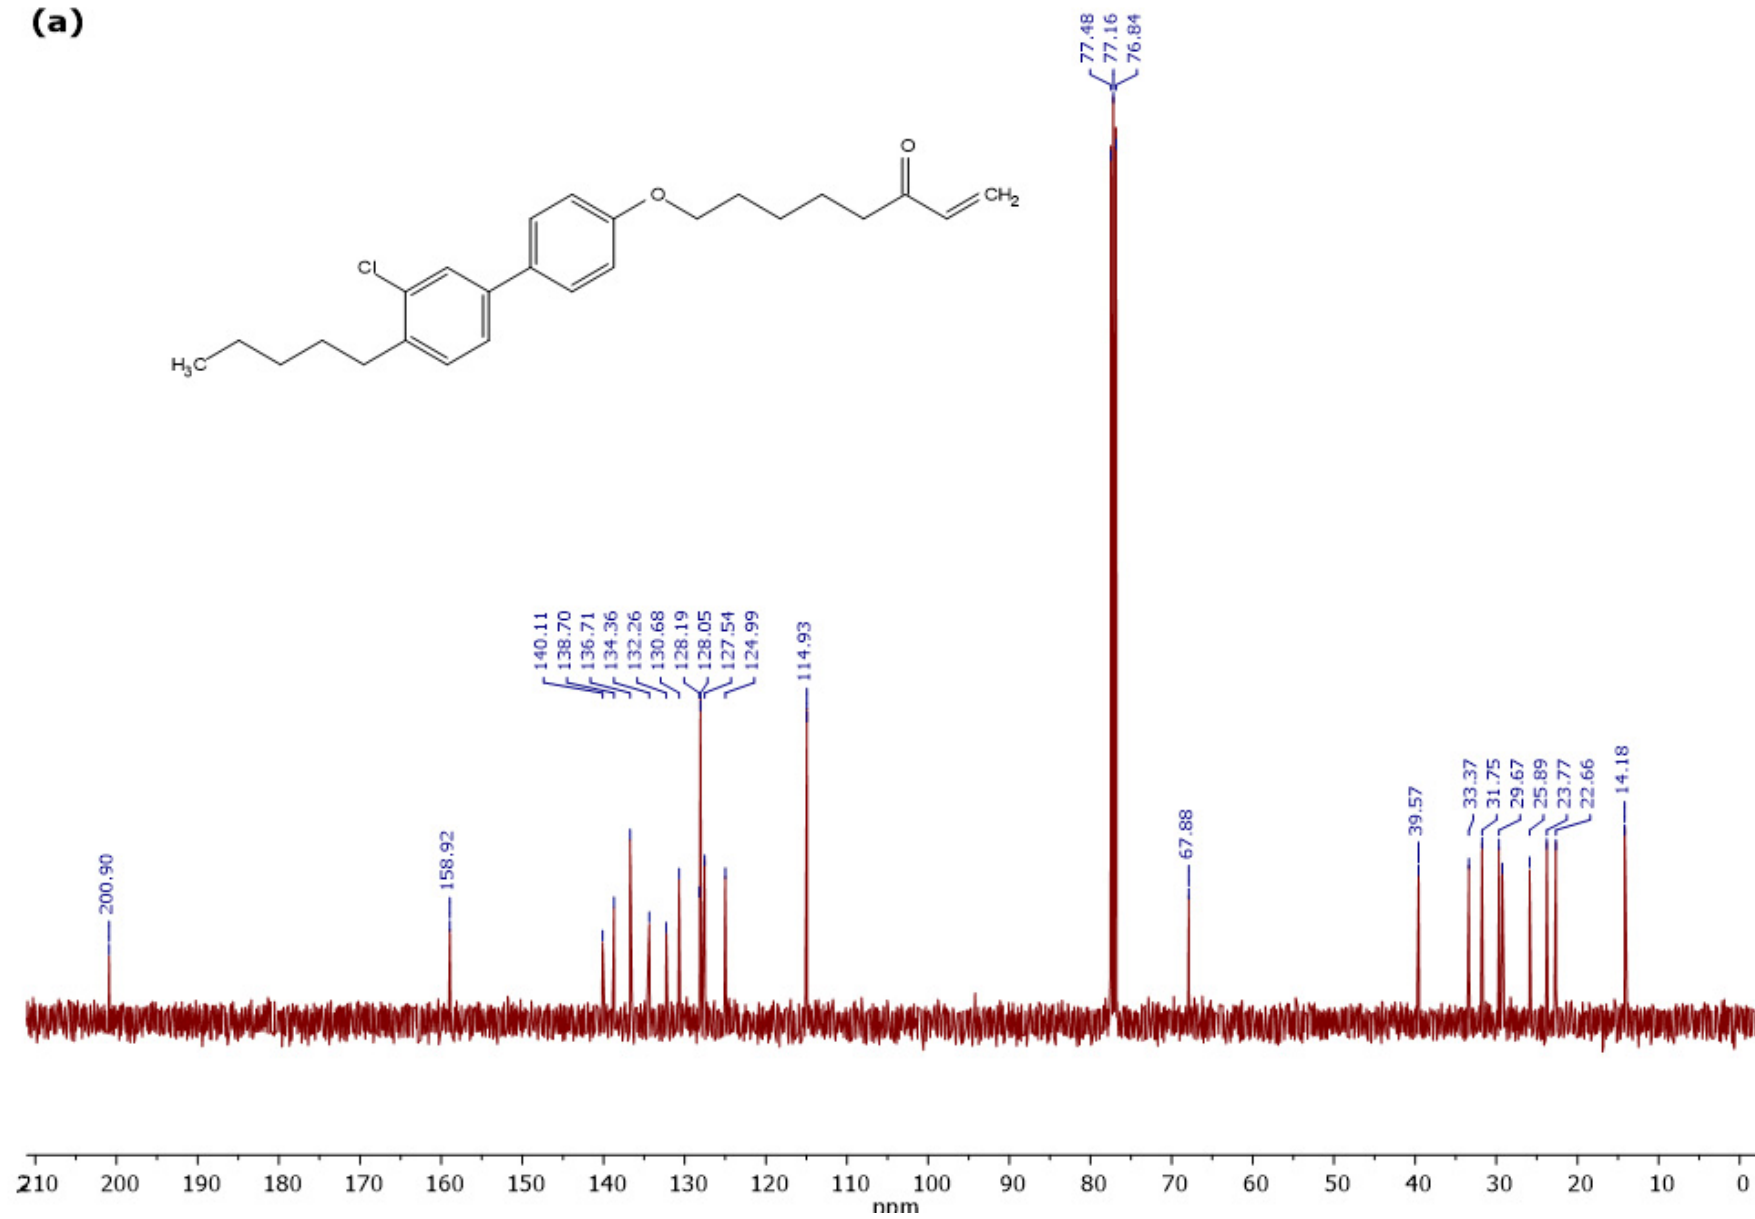

**(b)**

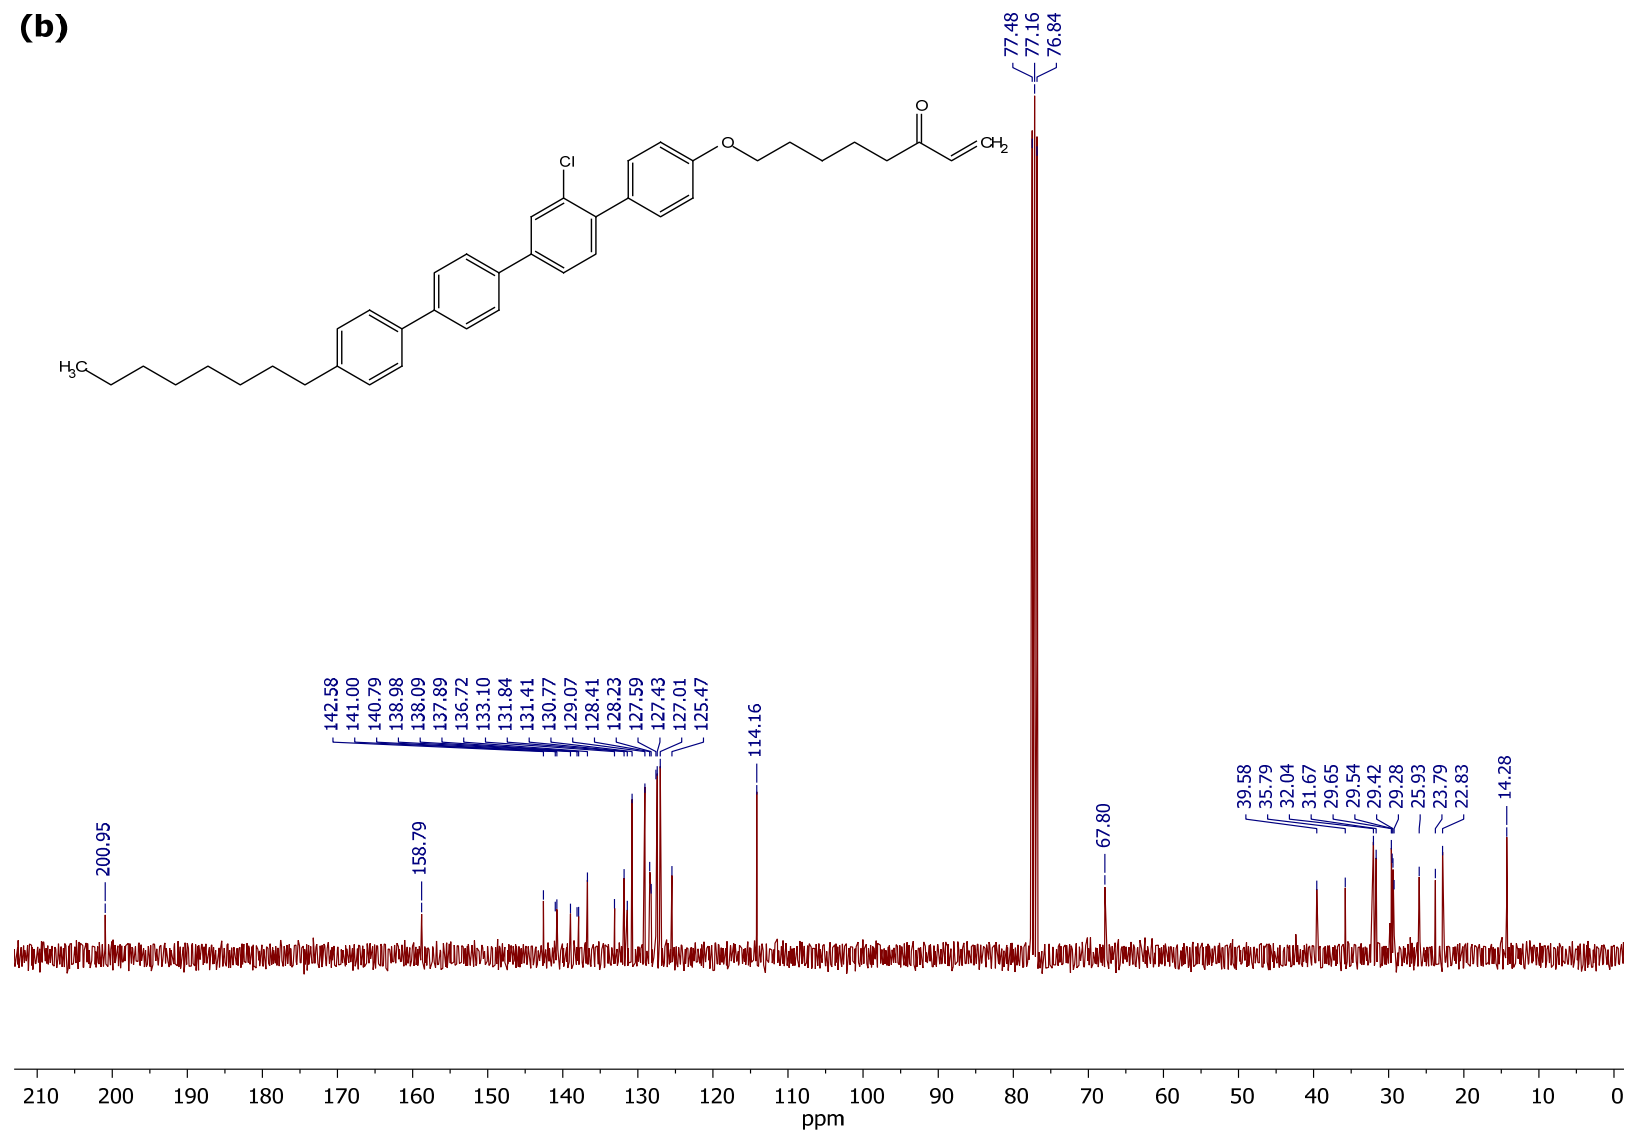

**Figure S2.** The <sup>13</sup>C spectra of BVK (a) and QVK (b) monomers in CDCl<sub>3</sub>.

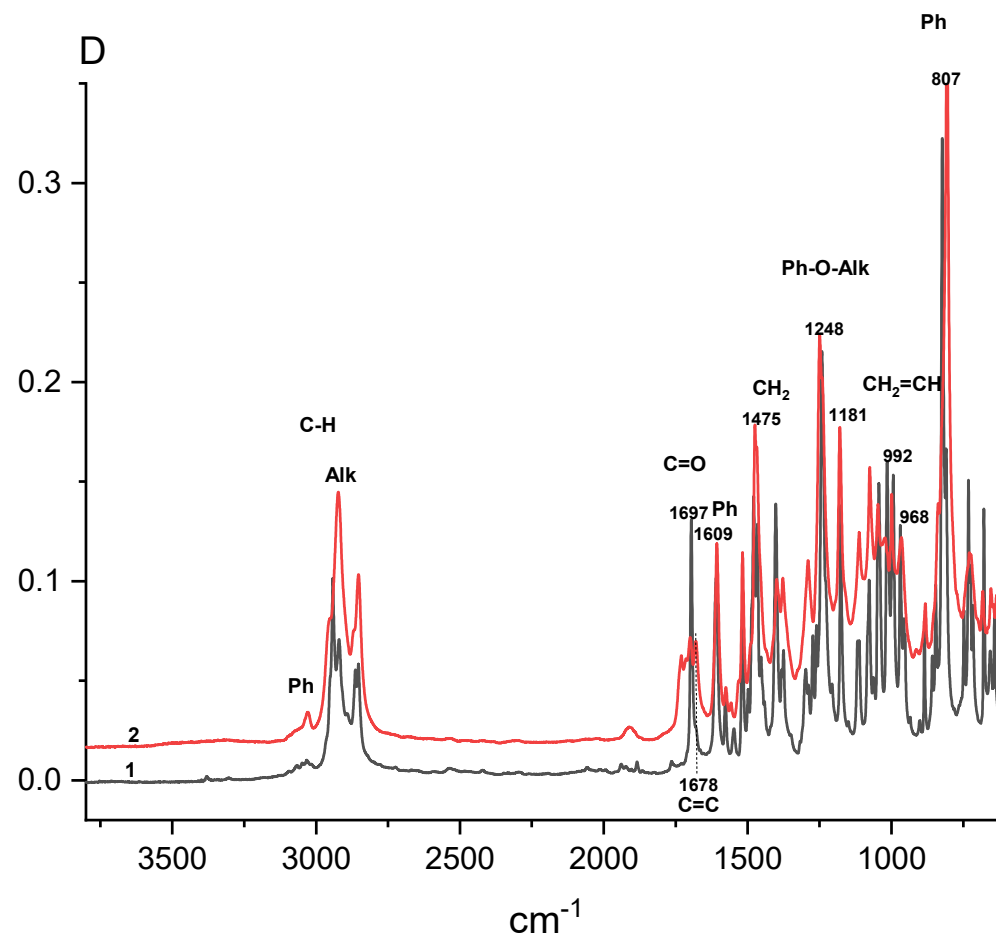

**Figure S3.** IR spectra of BVK(1) and QVK (2)

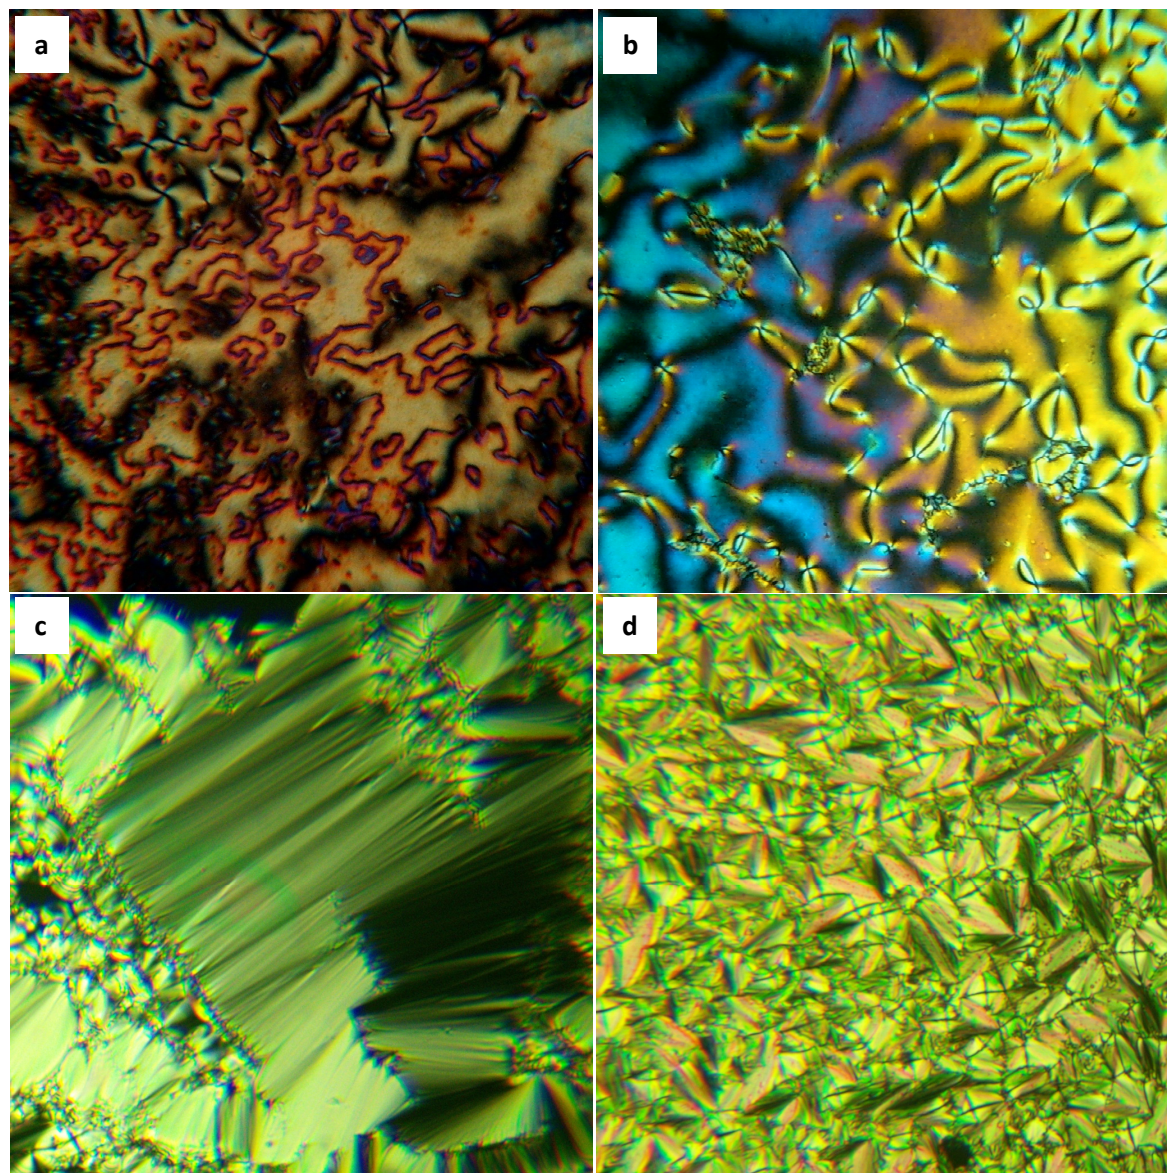

**Figure S4.** Thread-like/schlieren mixed texture of TVK (a) and schlieren texture of poly(TVK) (b); fan-shaped texture of QVK (c) and focal conic texture of poly(QVK)
